# Supplementary material for: FlhF(T368A) modulates motility in the bacteriophage carrier state of Campylobacter jejuni
Source: PubMed Central journal article supplement (PMC6282759; doi:10.1111/mmi.14120), 2018-10-23
Supplement: MMI-110-616-s001.pdf [file MMI-110-616-s001.pdf]

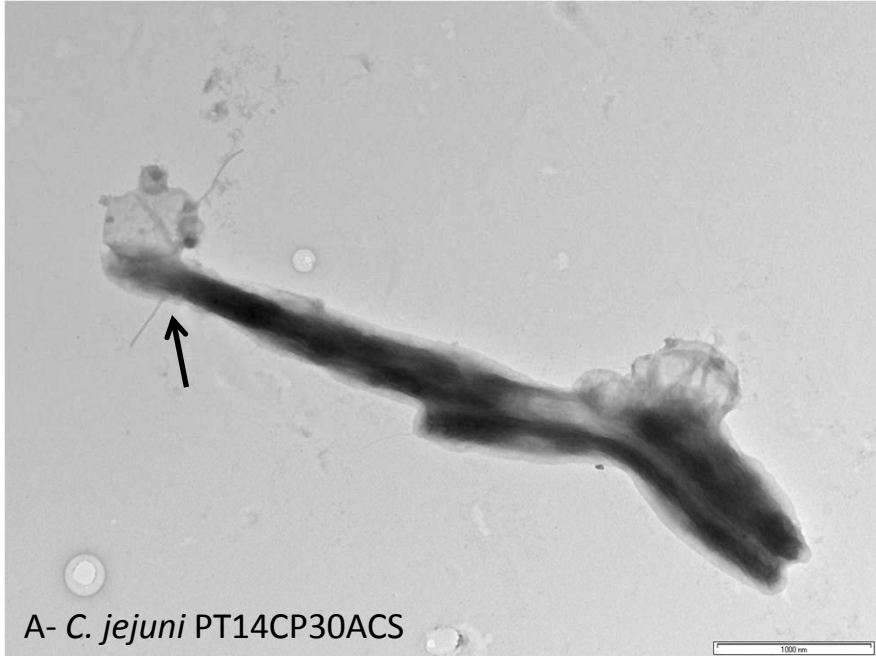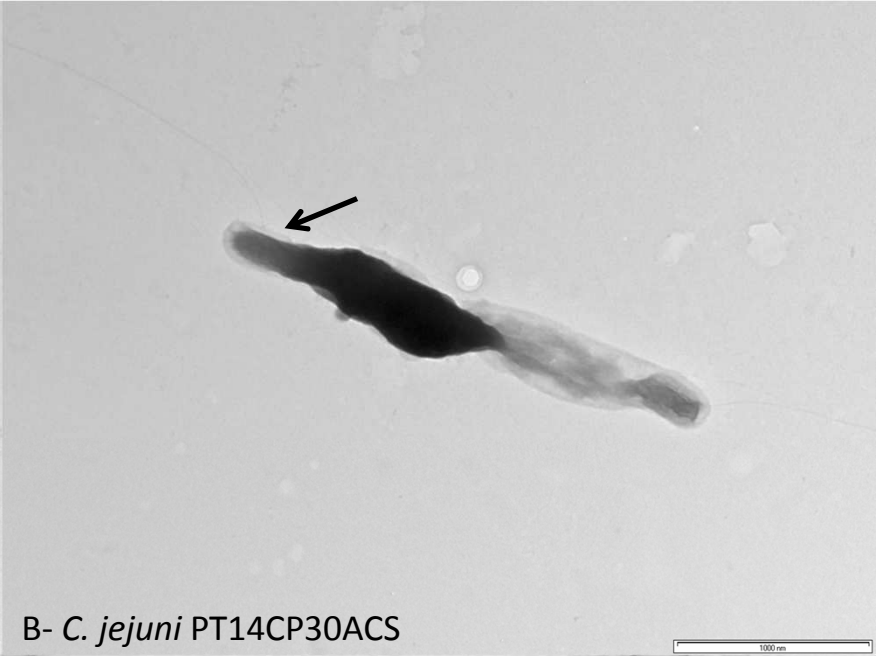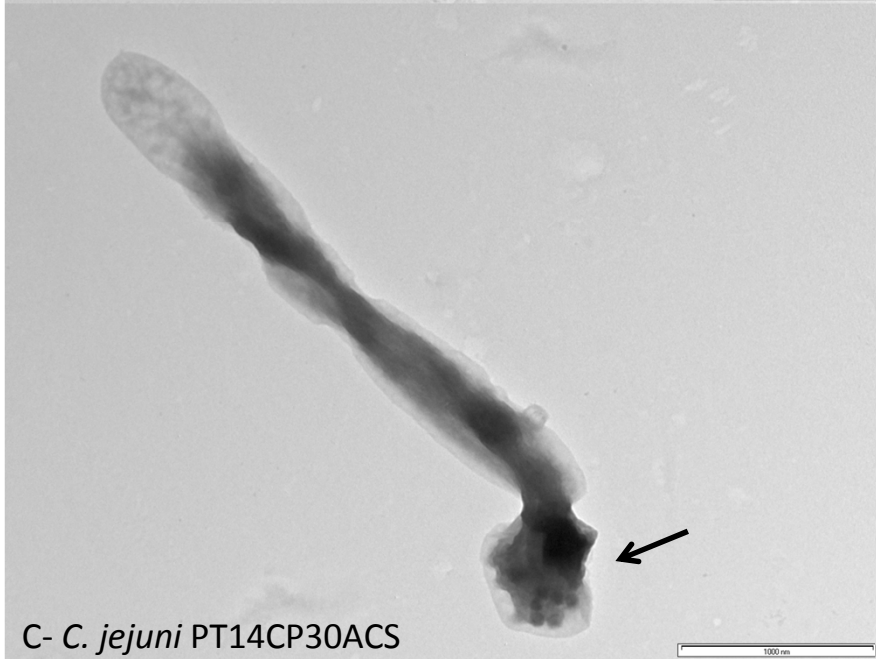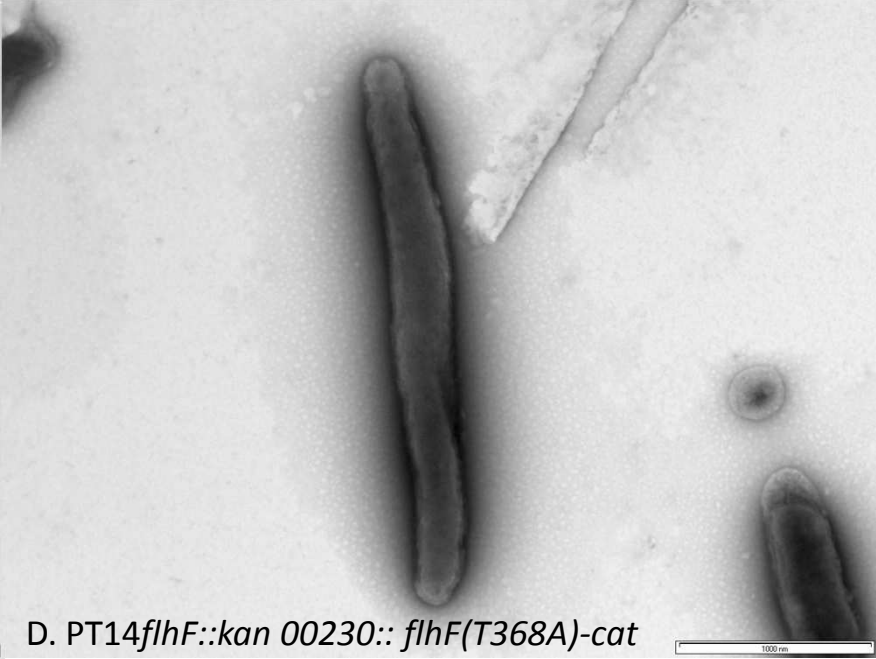

TEMs of *C. jejuni*. Panels A and B carrier state bacteria with arrows indicating a short non-polar flagellum; C carrier state with the arrow indicating encapsulated phage; D Typical non-flagellated *flhF*(T368) complement *C. jejuni* with reduced helical pitch.
